# Supplementary material for: DNA hypermethylation and decreased mRNA expression of MAL, PRIMA1, PTGDR and SFRP1 in colorectal adenoma and cancer
Source: PubMed Central journal article supplement (PMC4612409; doi:10.1186/s12885-015-1687-x), 2015-10-19

## Supplementary Fig 1

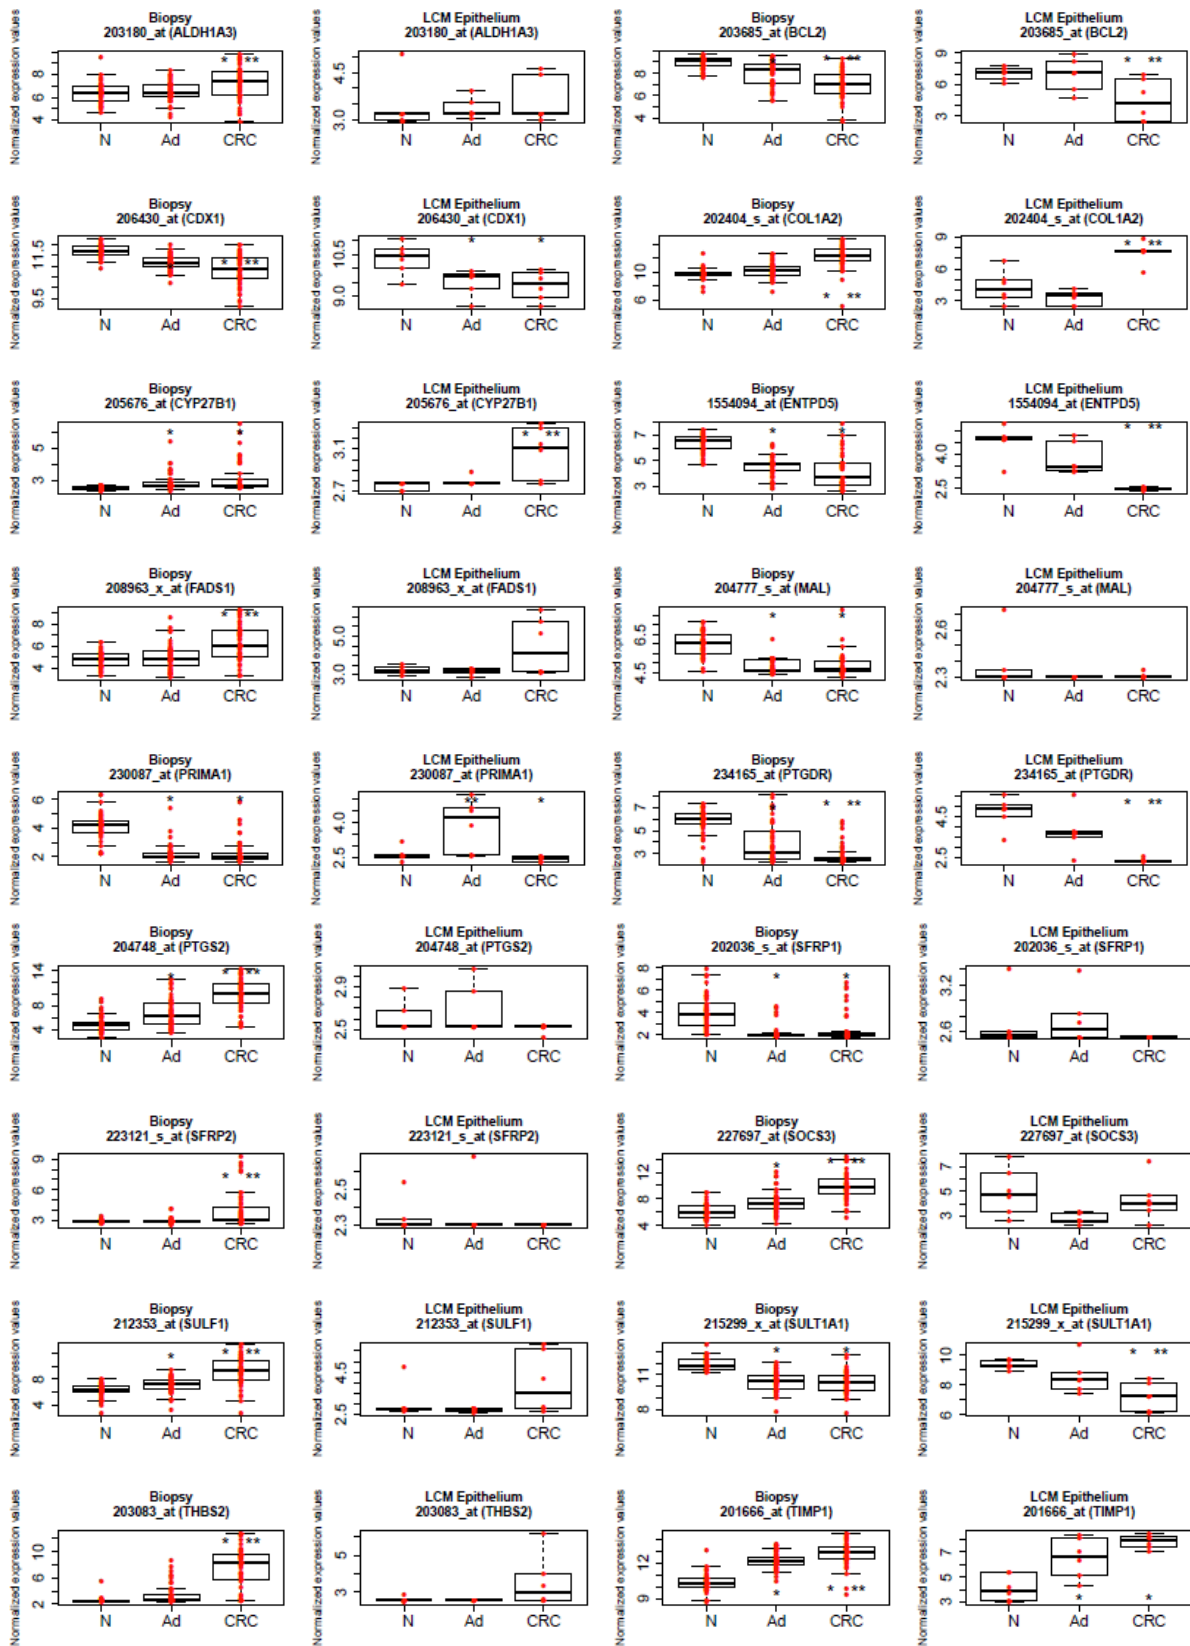

Supplement: 12885_2015_1687_MOESM3_ESM.pdf [file 12885_2015_1687_MOESM3_ESM.pdf]
