# Supplementary material for: DNA hypermethylation and decreased mRNA expression of MAL, PRIMA1, PTGDR and SFRP1 in colorectal adenoma and cancer
Source: Springer Nature journal article supplement (doi:10.1186/s12885-015-1687-x), 2015-10-19

## Supplementary Fig 2

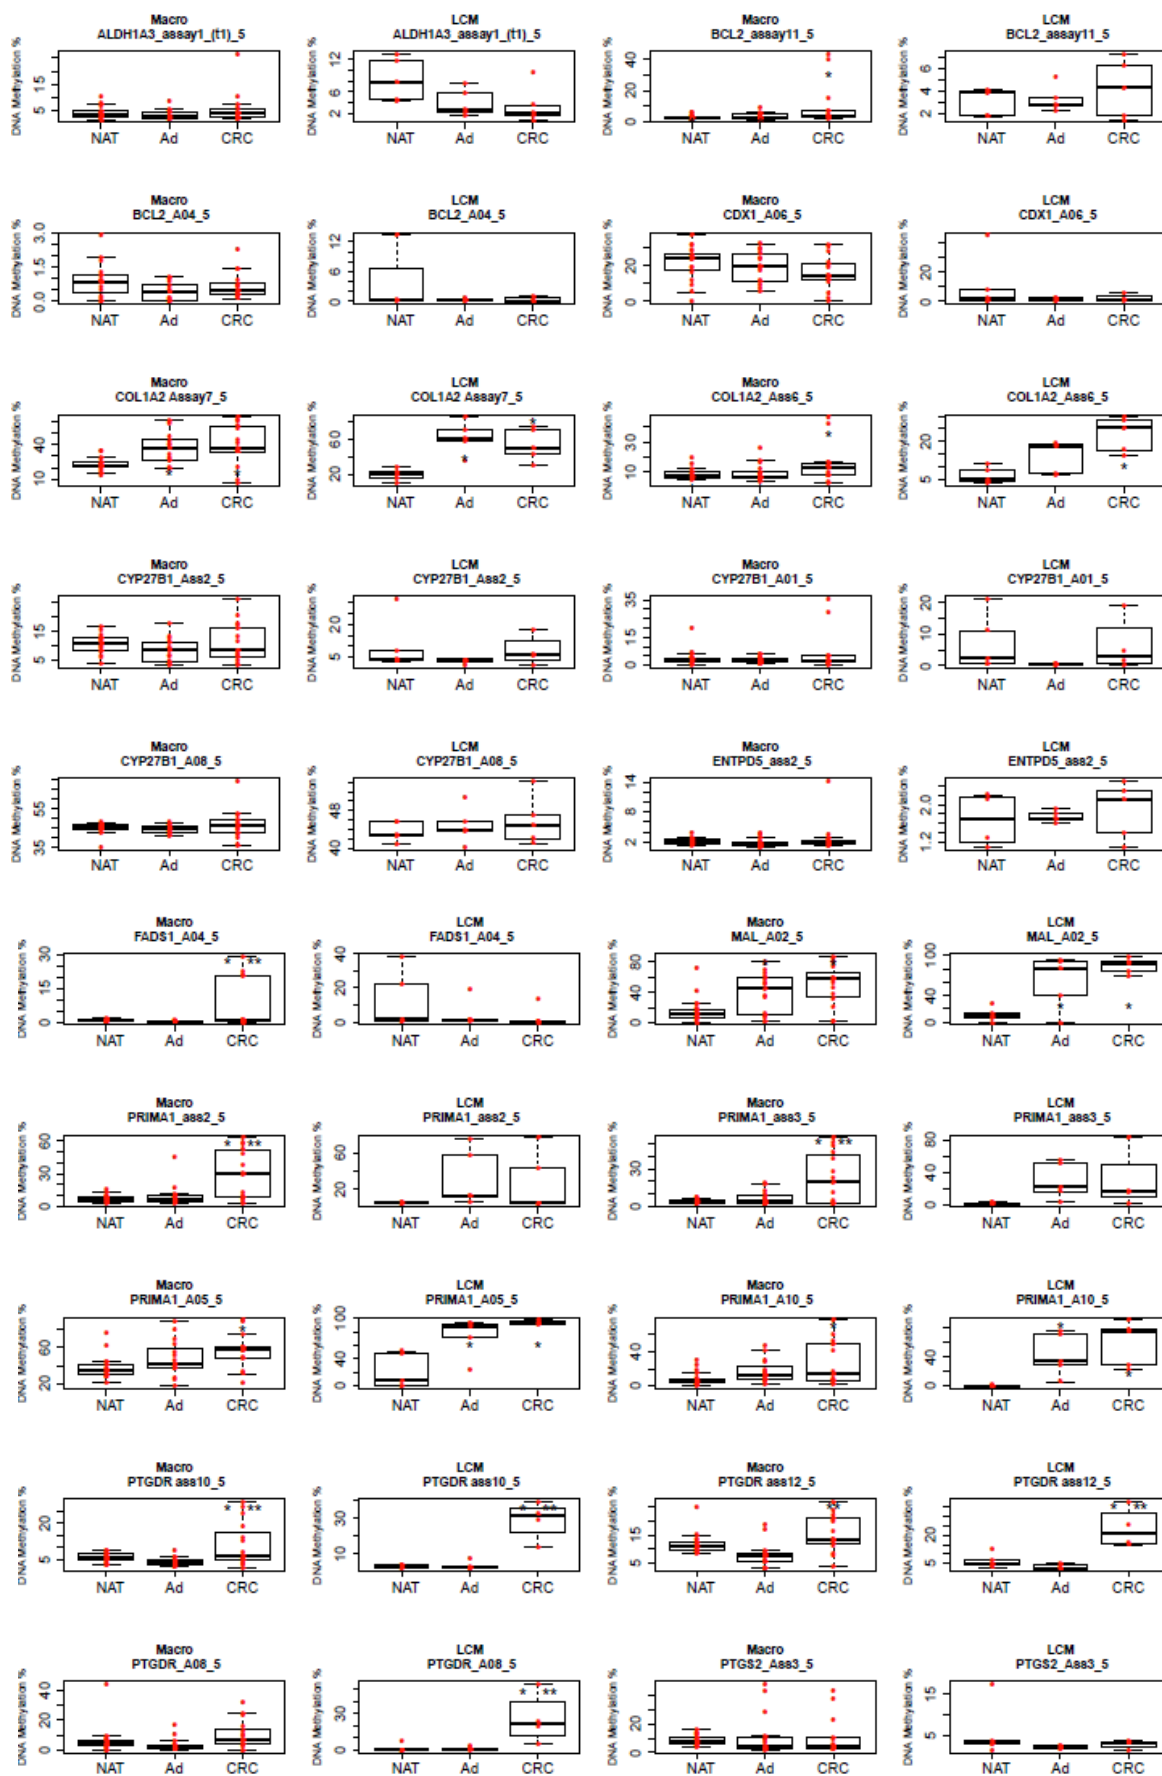

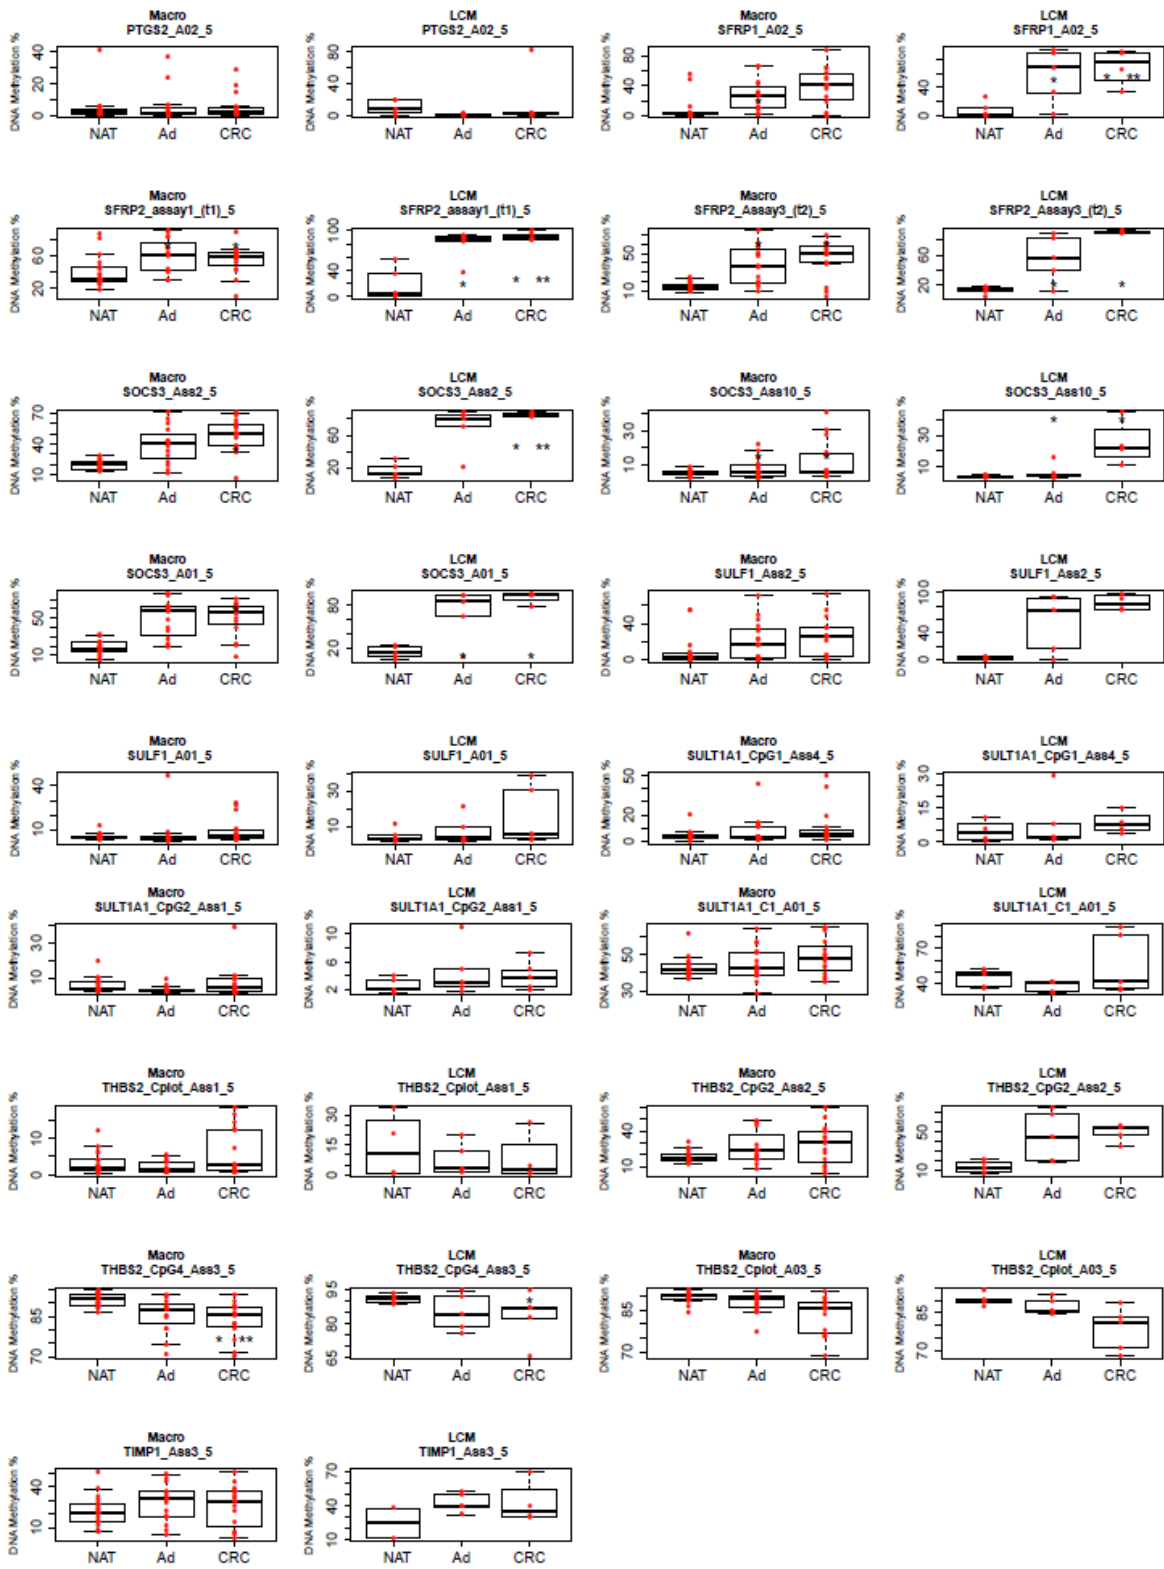

Supplement: MOESM5 [file 9745156]
